# Supplementary material for: Actin filaments target the oligomeric maturation of the dynamin GTPase Drp1 to mitochondrial fission sites
Source: eLife journal article supplement (doi:10.7554/elife.11553), 2015-11-26

Figure 6-figure supplement 2

A

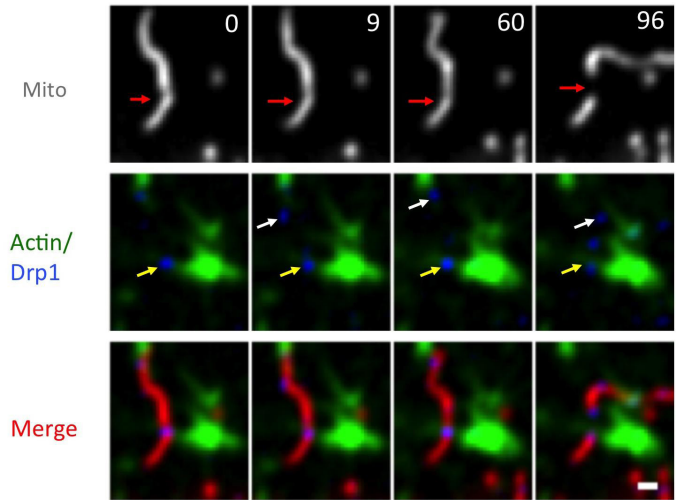

C

| Fission event analysis                            | N=59       |
|---------------------------------------------------|------------|
| actin presence at fission sites                   | 33 (55.9%) |
| expected N of fission with actin if due to chance | 16 (28.0%) |

\*\*

B

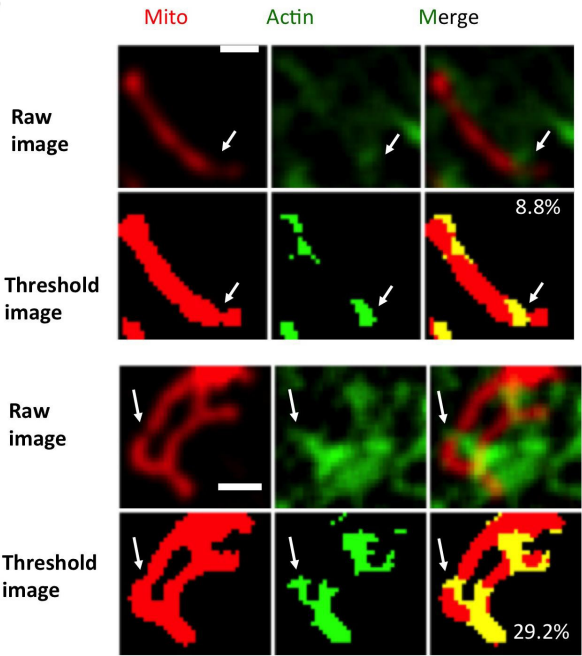

Supplement: supp [file elife-11553-supp-v1.zip]
