# Supplementary figures and images for: Actin filaments target the oligomeric maturation of the dynamin GTPase Drp1 to mitochondrial fission sites
Source: eLife journal article supplement (doi:10.7554/elife.11553), 2015-11-26

Figure 1-figure supplement 2

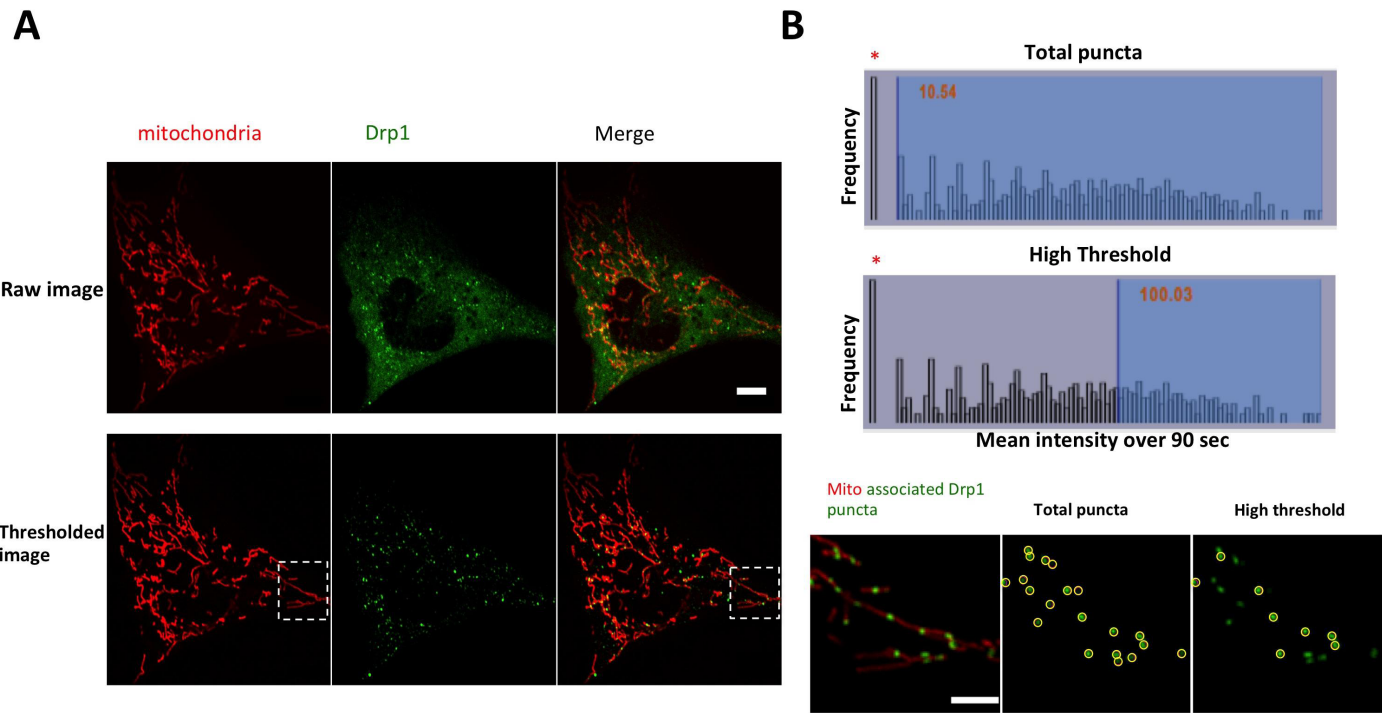

Supplement: supp [file elife-11553-supp-v1.zip]

Figure 1-figure supplement 1

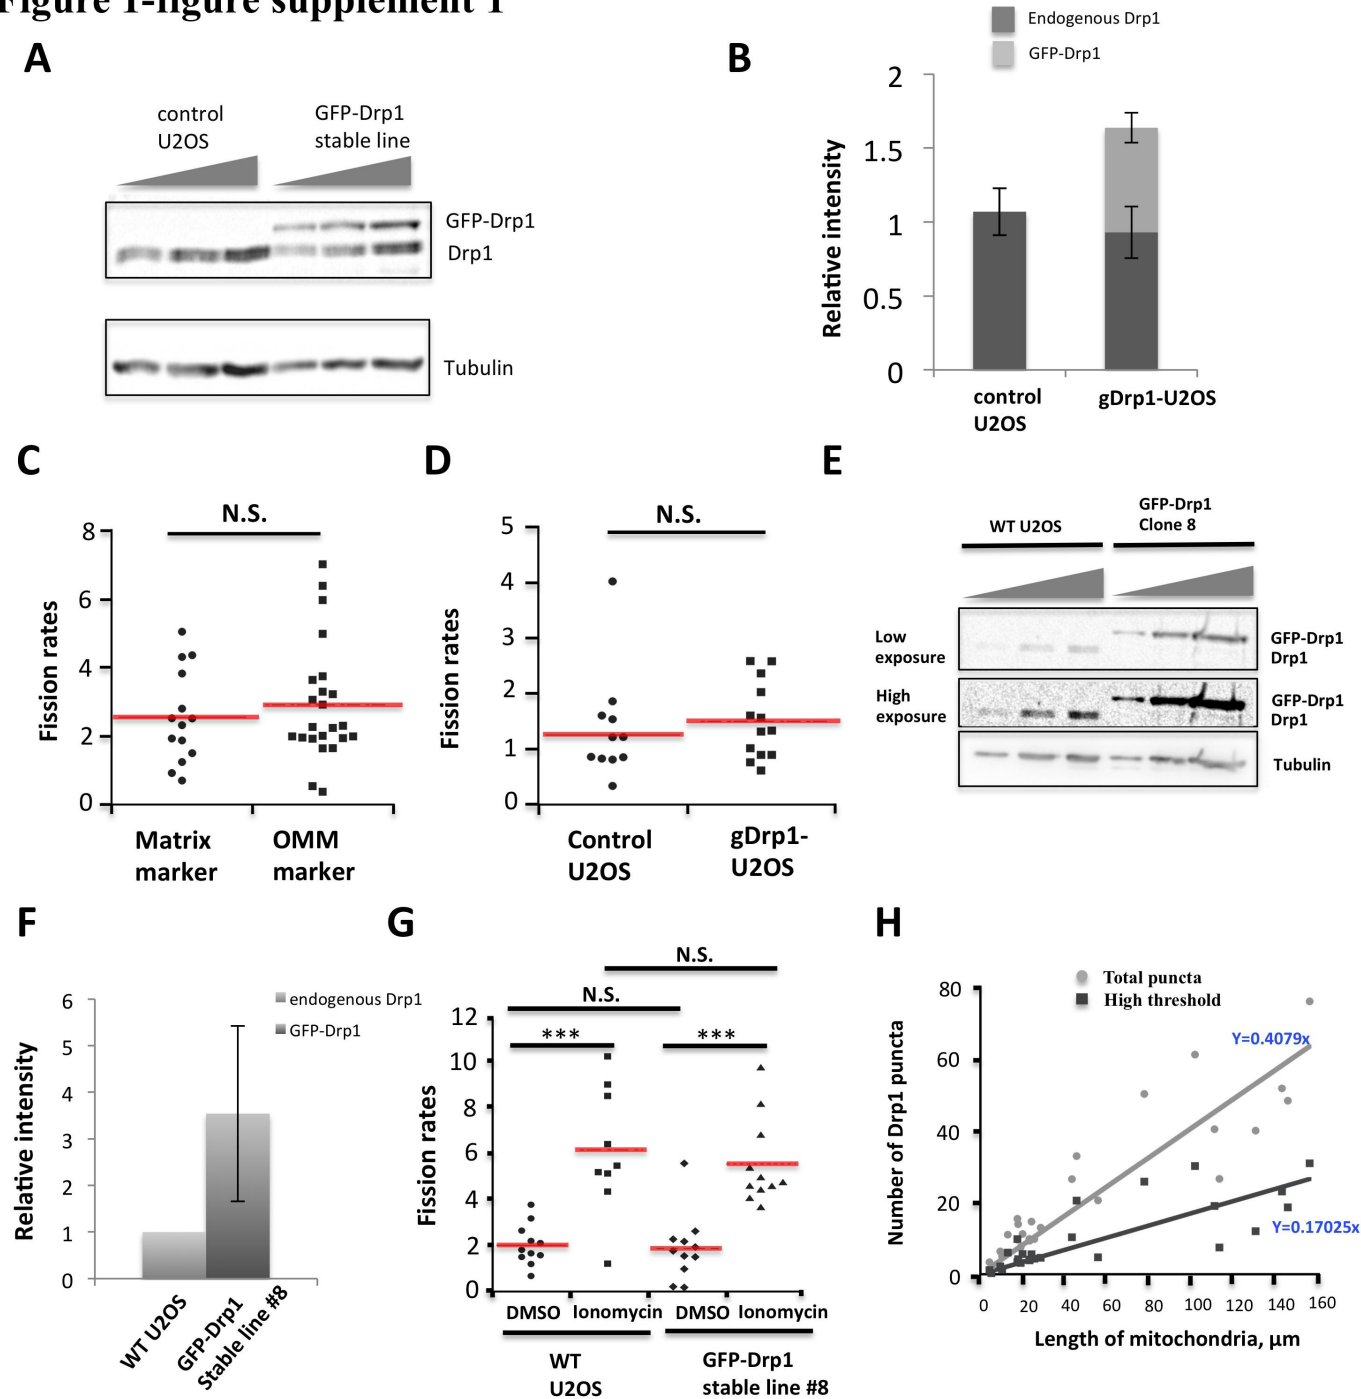

Supplement: supp [file elife-11553-supp-v1.zip]

Figure 4-figure supplement 1

A

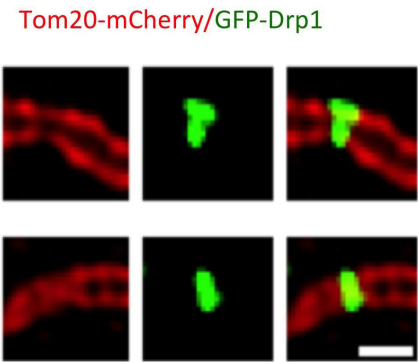

B

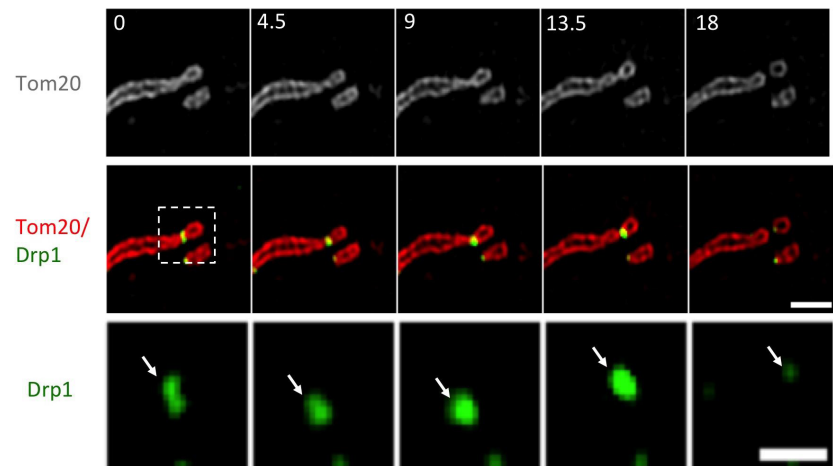

Supplement: supp [file elife-11553-supp-v1.zip]

Figure 6-figure supplement 3

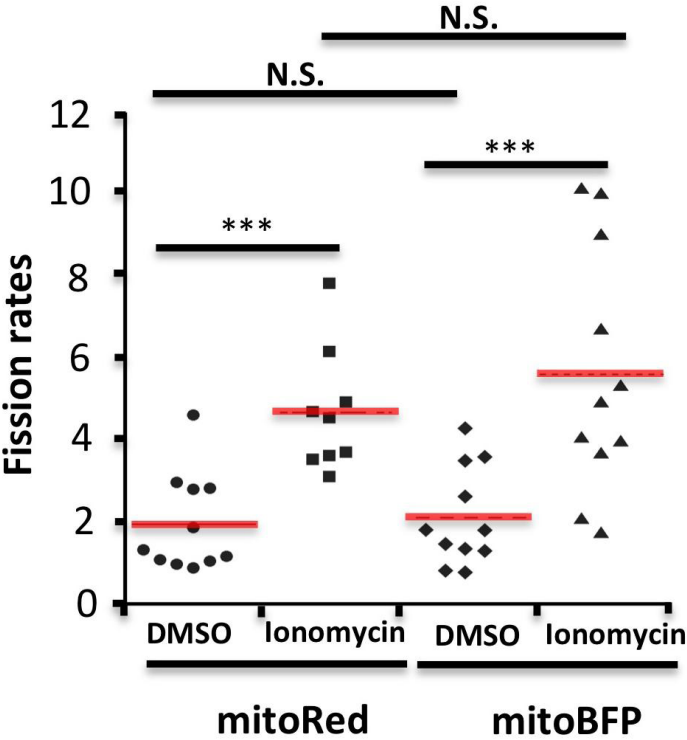

Supplement: supp [file elife-11553-supp-v1.zip]

Figure 8-figure supplement 1

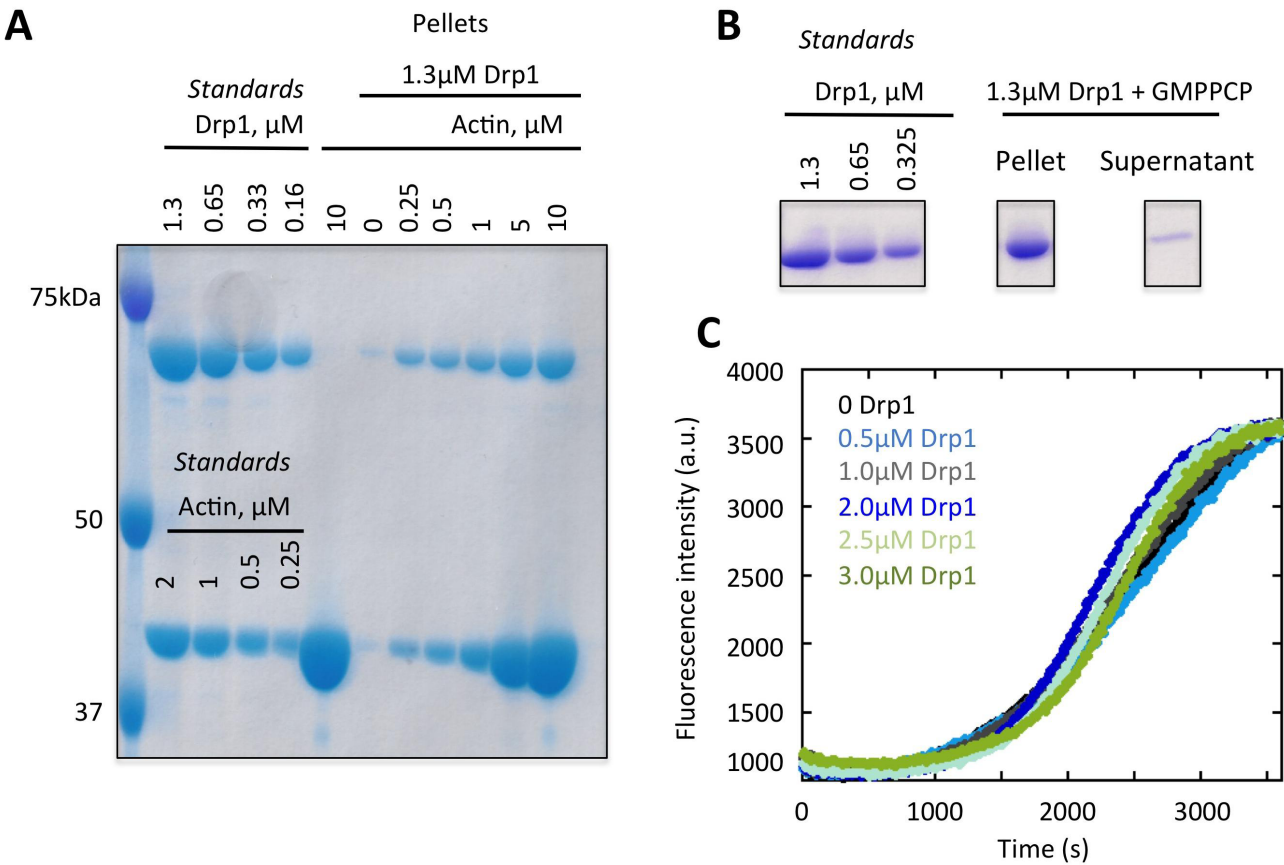

Supplement: supp [file elife-11553-supp-v1.zip]

Figure 6-figure supplement 4

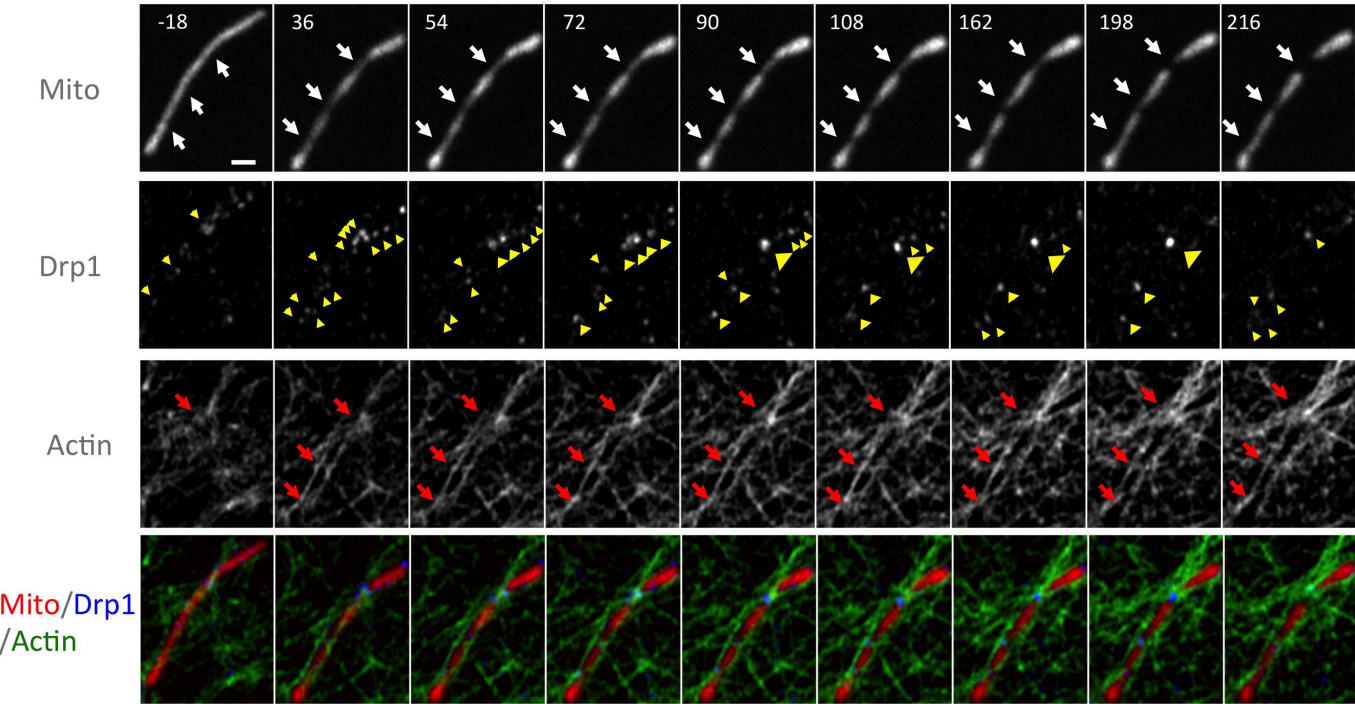

Supplement: supp [file elife-11553-supp-v1.zip]

Figure 2-figure supplement 1

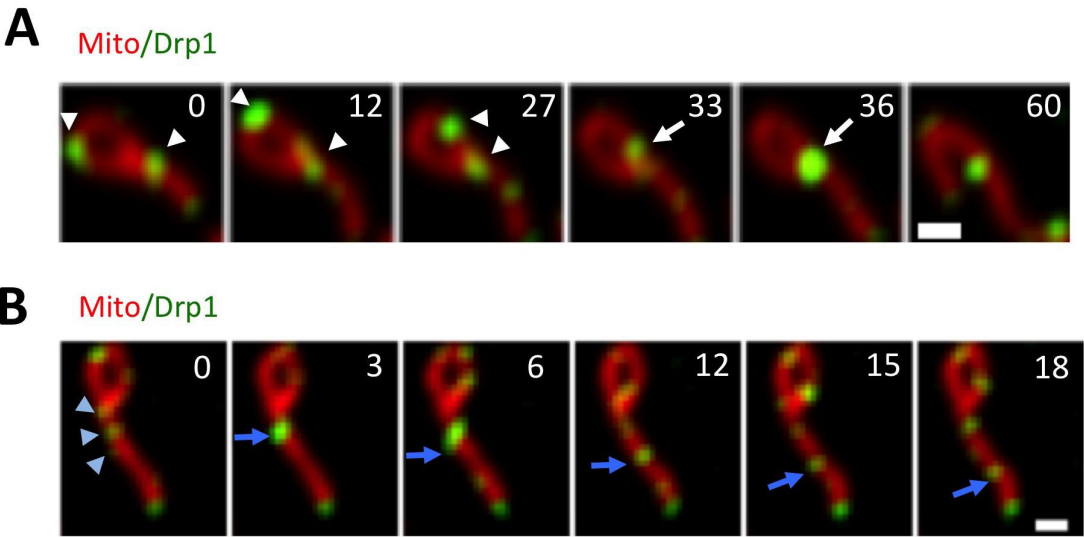

Supplement: supp [file elife-11553-supp-v1.zip]

Figure 5-figure supplement 1

A

Tom20/ Drp1

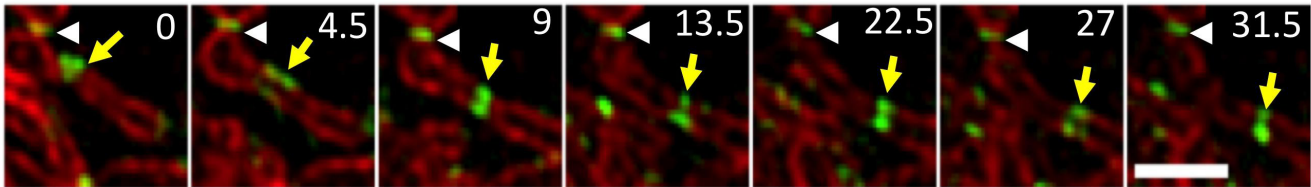

B

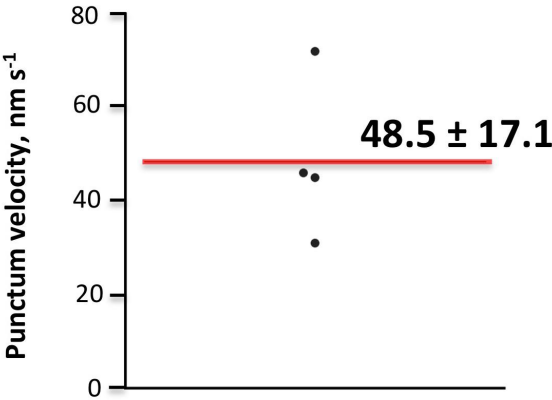

Supplement: supp [file elife-11553-supp-v1.zip]

Figure 3-figure supplement 1

A

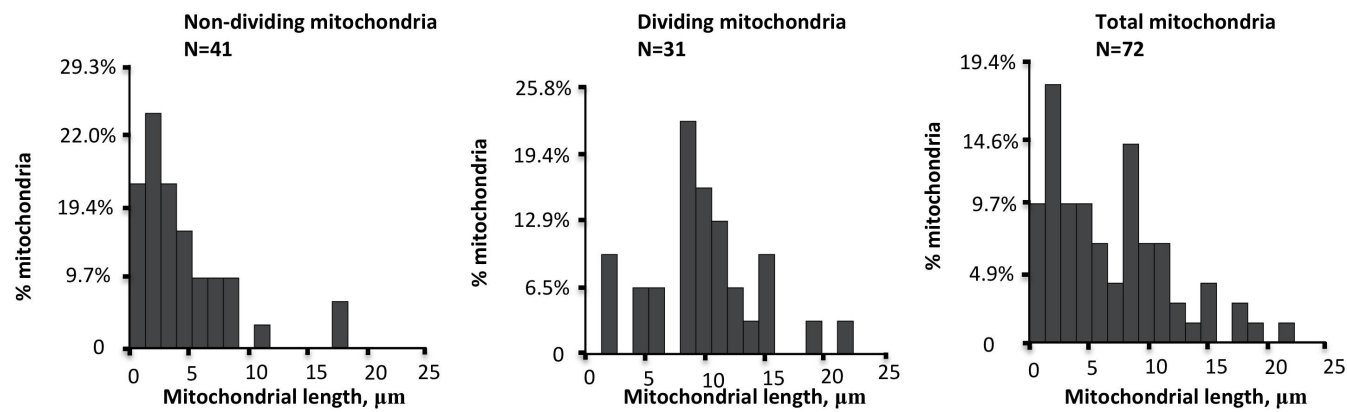

B

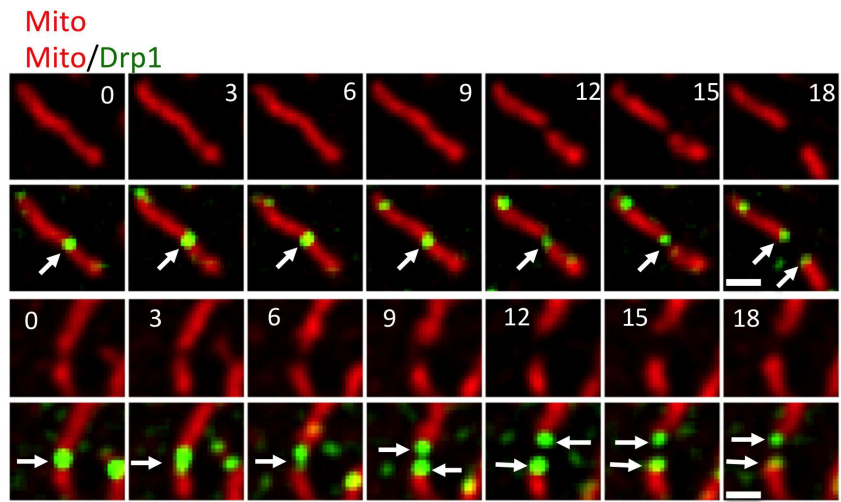

C

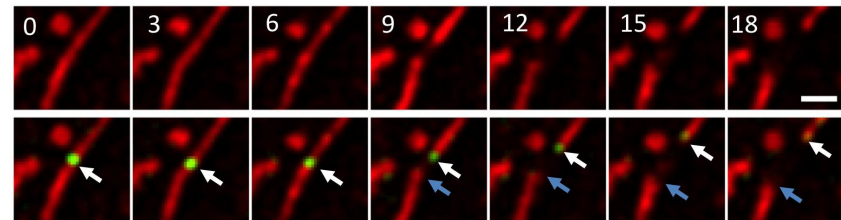

D

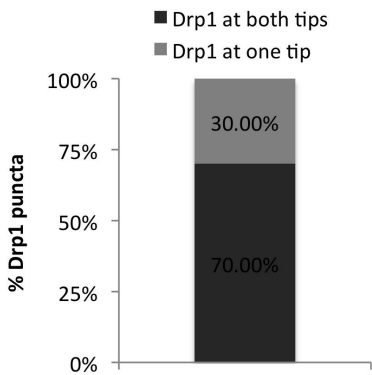

Supplement: supp [file elife-11553-supp-v1.zip]

Figure 6-figure supplement 1

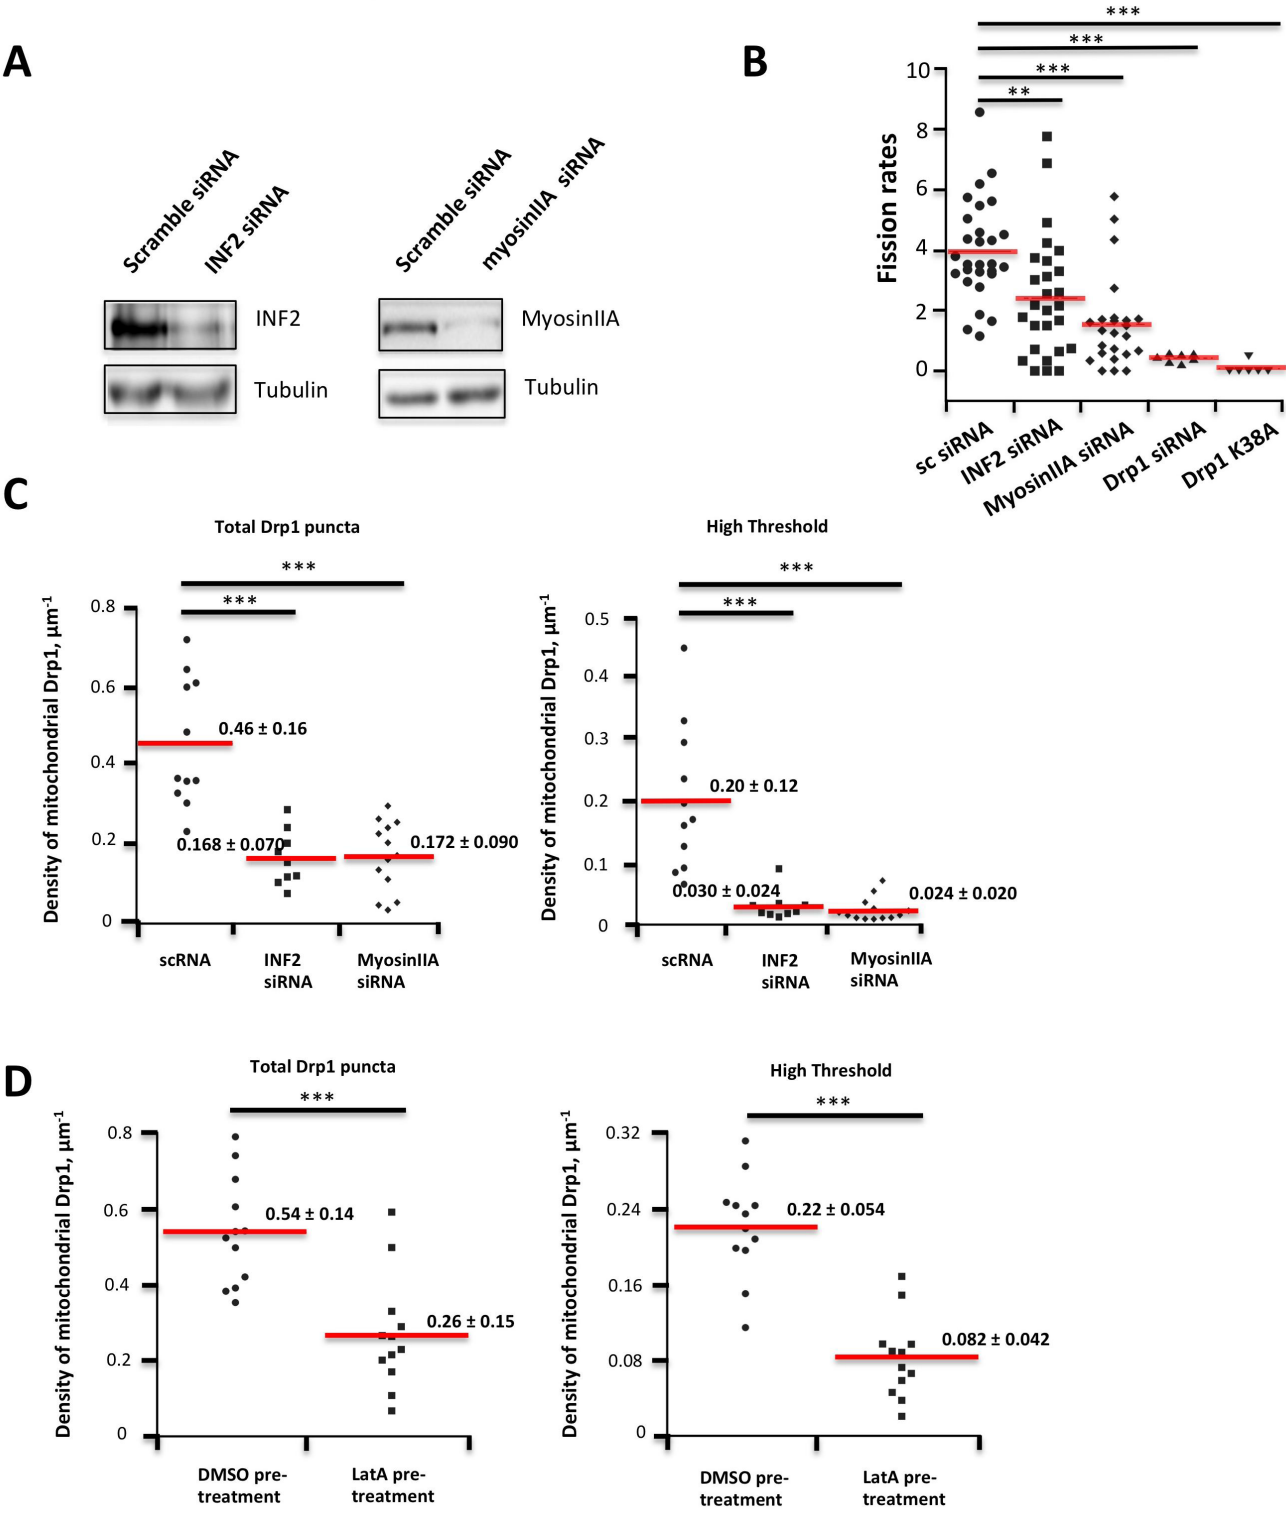

Supplement: supp [file elife-11553-supp-v1.zip]
